# Supplementary figures and images for: Small-Molecule Dual PLK1 and BRD4 Inhibitors are Active Against Preclinical Models of Pediatric Solid Tumors
Source: PubMed Central journal article supplement — Transl Oncol. 2019 Dec 21;13(2):221–32. doi: 10.1016/j.tranon.2019.09.013 (PMC6931204; doi:10.1016/j.tranon.2019.09.013), 2019-12-21

# Supplemental Figure 1

**A**

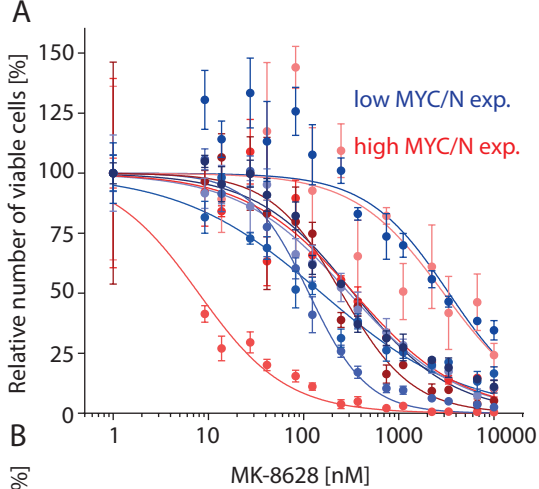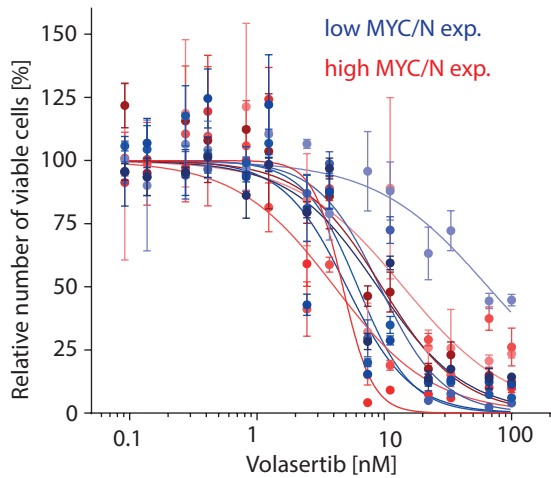

**B**

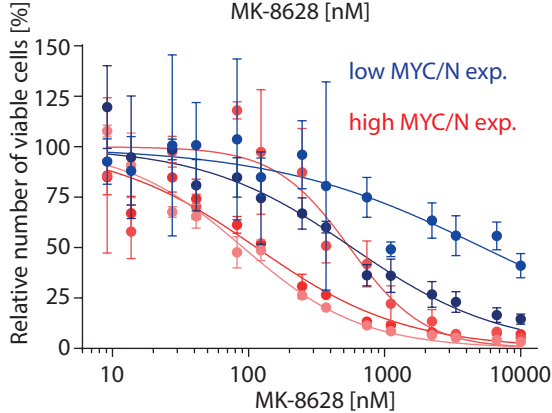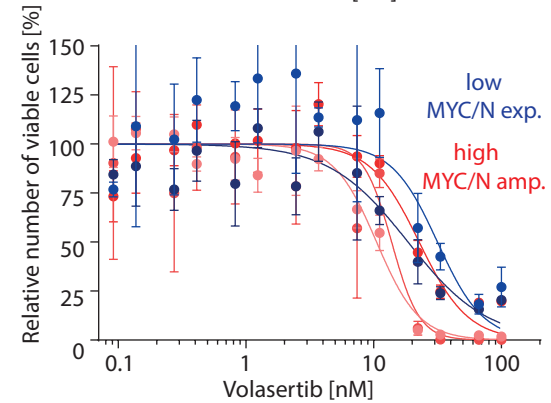

**C**

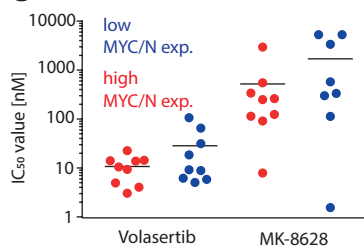

**D**

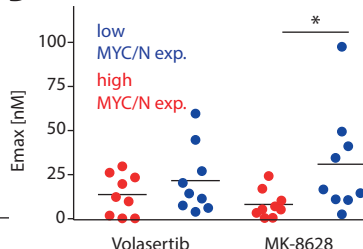

**E**

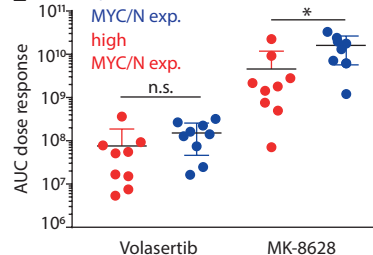

Supplement: mmc2.pdf [file mmc2.pdf]

# Supplemental Figure 3

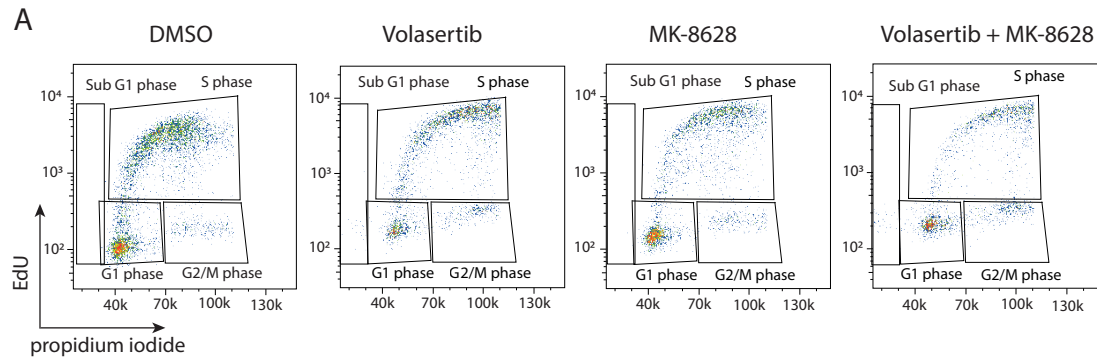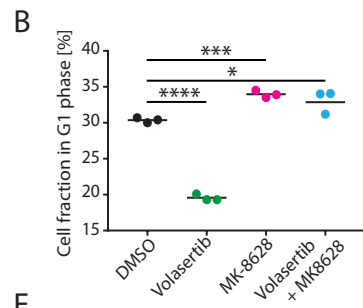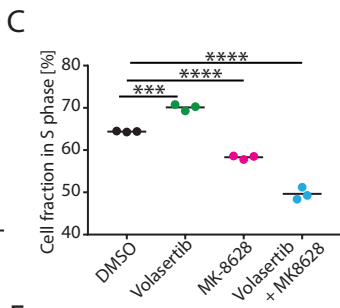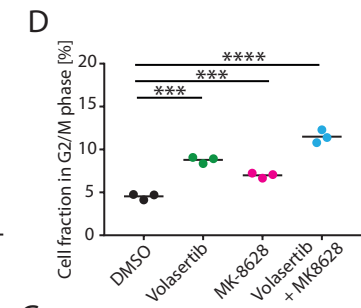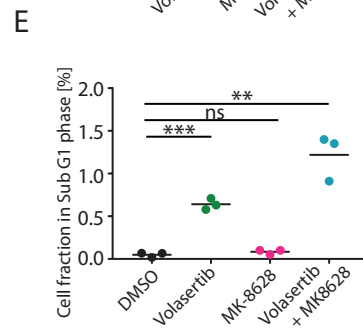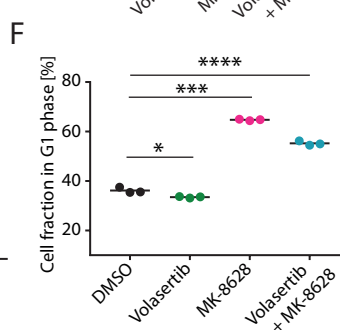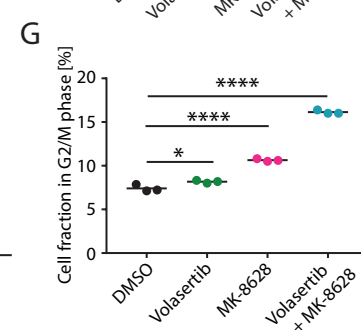

Supplement: mmc4.pdf [file mmc4.pdf]

# Supplemental Figure 5

**A**

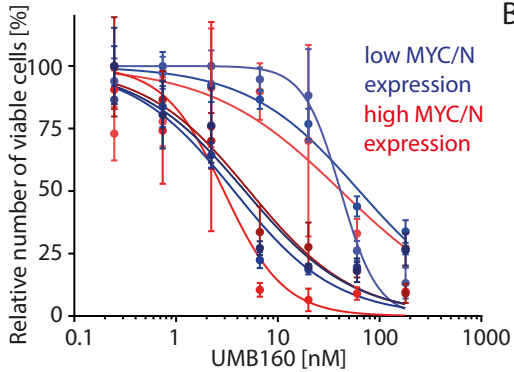

**B**

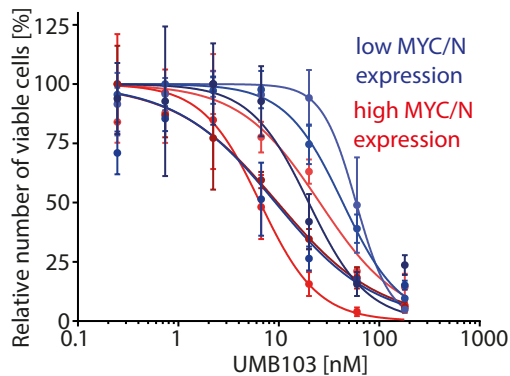

**C**

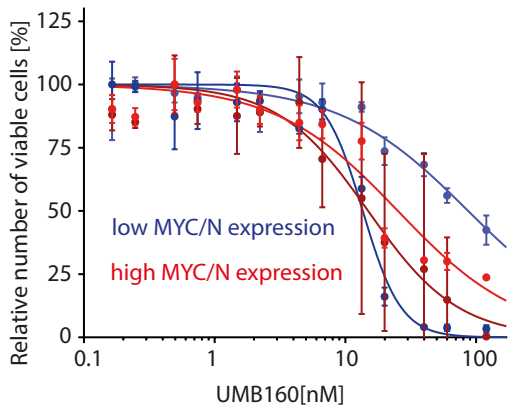

**D**

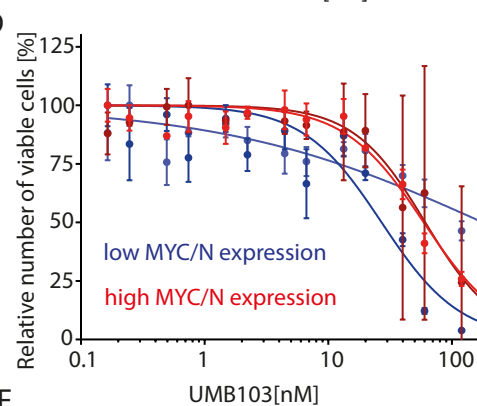

**E**

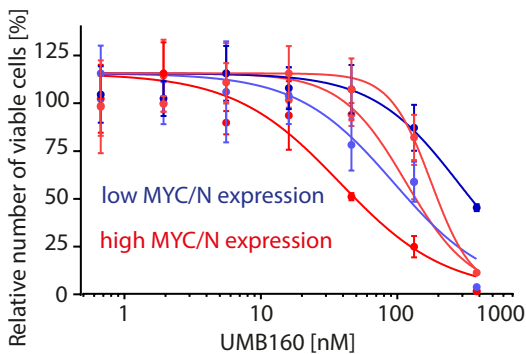

**F**

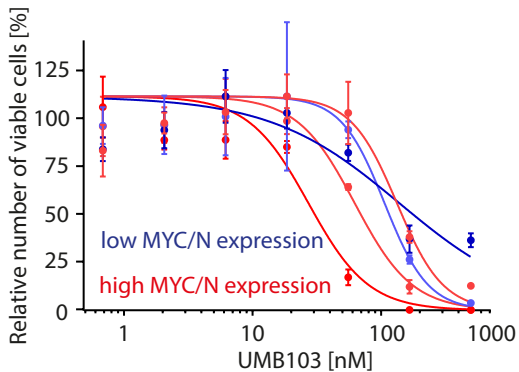

Supplement: mmc6.pdf [file mmc6.pdf]

# Supplemental Figure 6

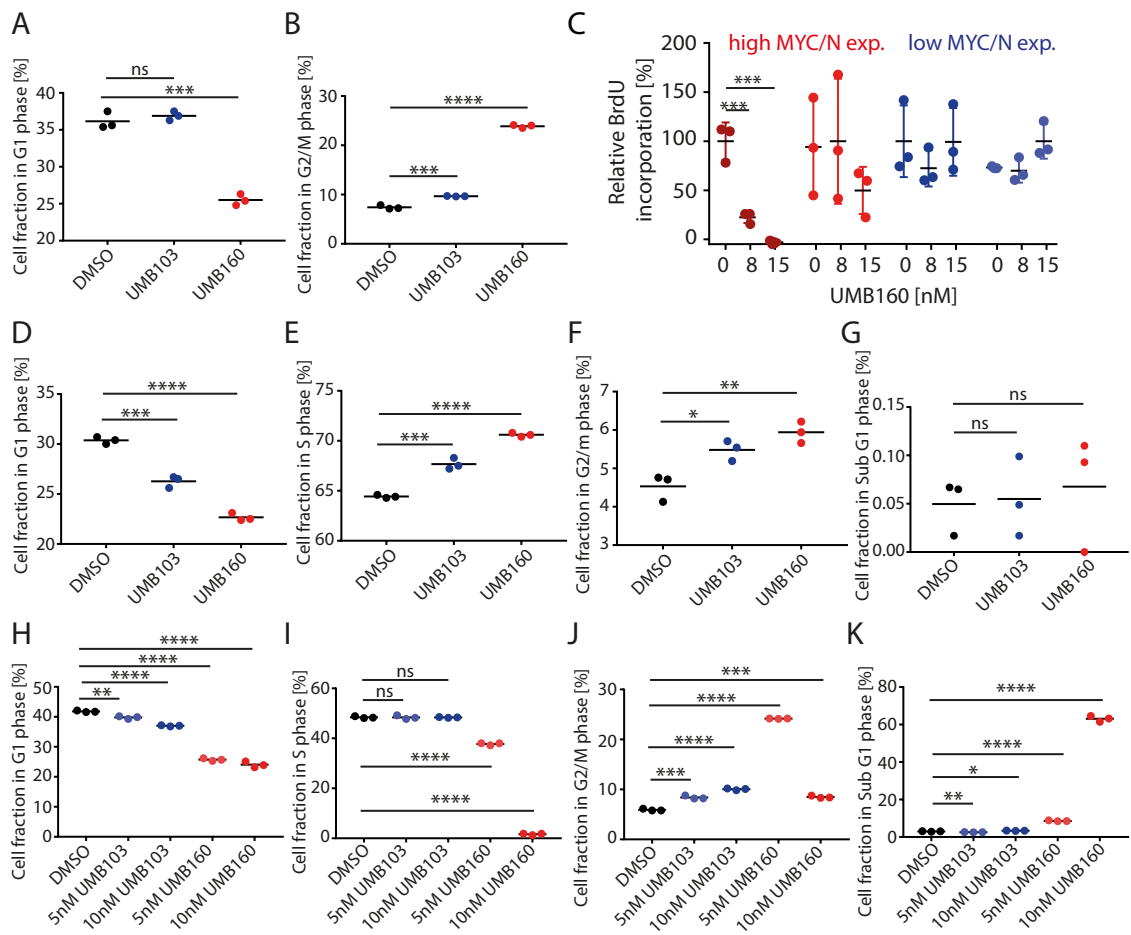

Supplement: mmc7.pdf [file mmc7.pdf]

# Supplemental Figure 7

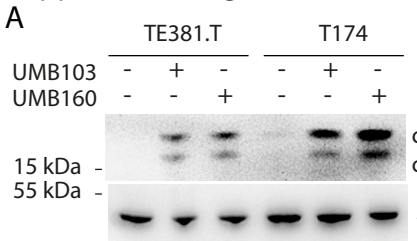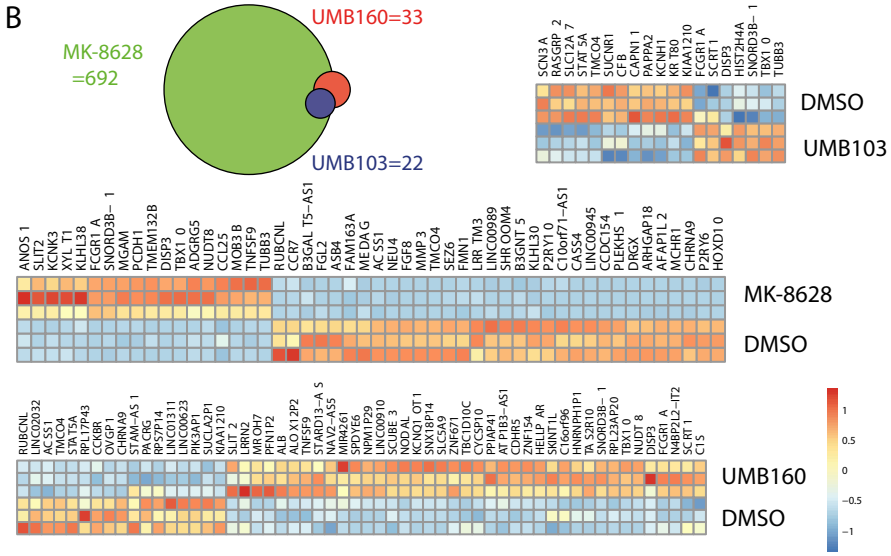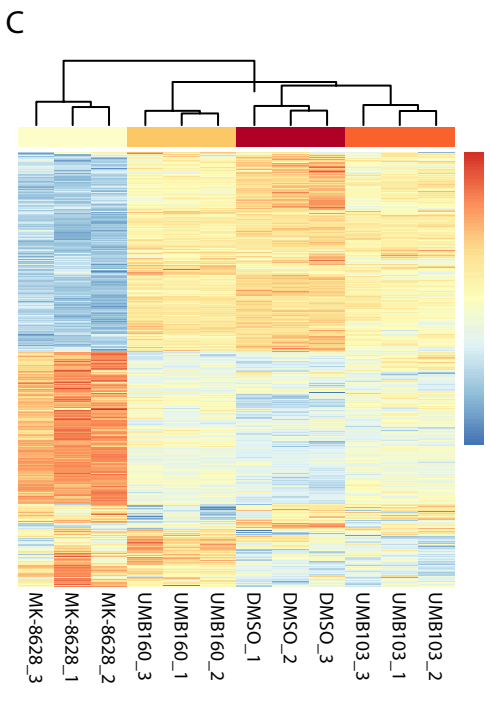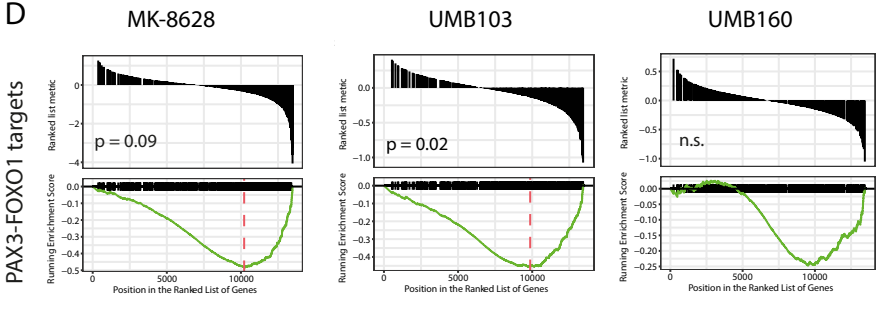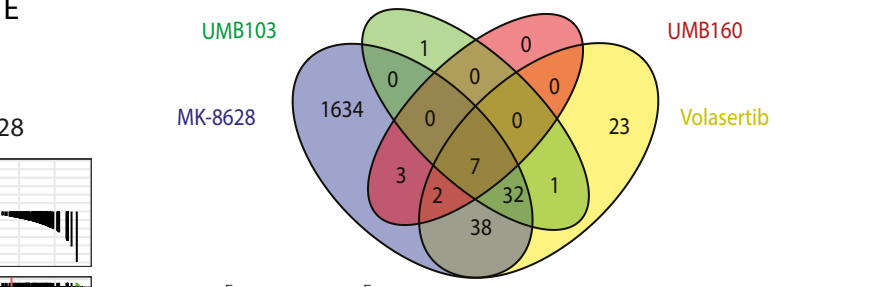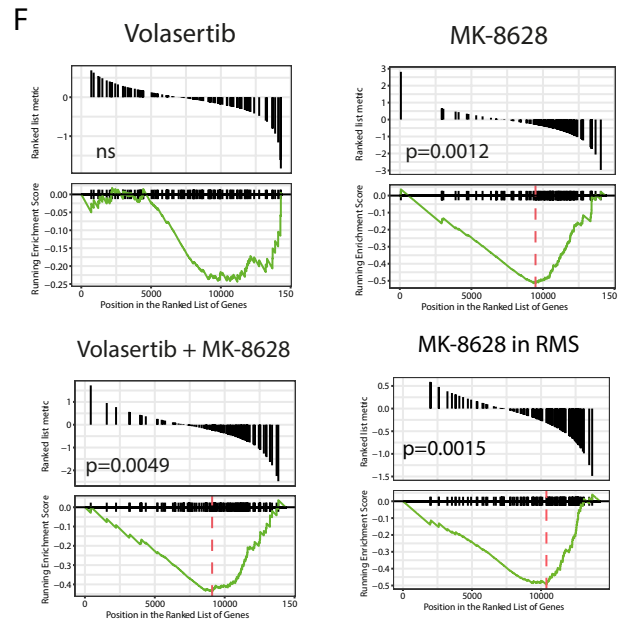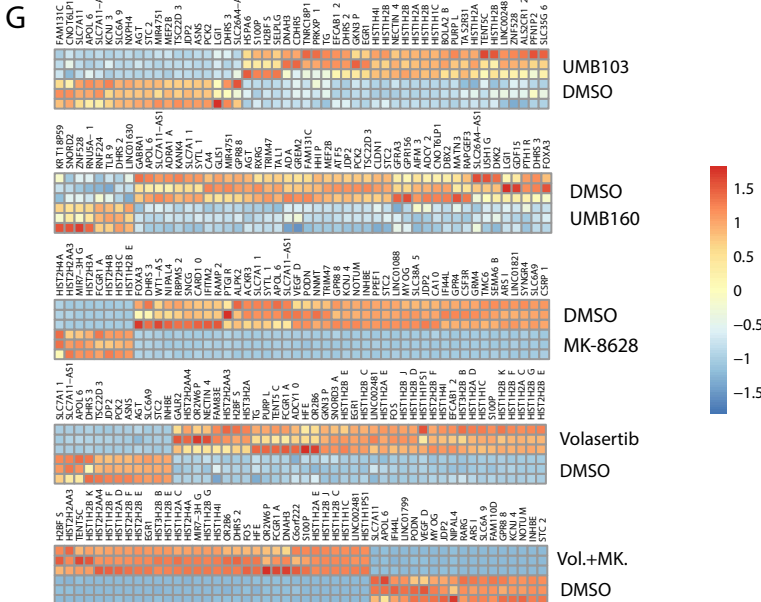

MYCN targets

Supplement: mmc8.pdf [file mmc8.pdf]
